# Supplementary material for: The identification and application of a robust ω-transaminase with high tolerance towards substrates and isopropylamine from a directed soil metagenome
Source: Royal Society of Chemistry journal article supplement (doi:10.1039/d1cy02032c), 2022-01-01
Supplement: d1cy02032c1.pdf [file d1cy02032c1.pdf]

## Supporting information

# The identification and application of a robust $\omega$ -transaminase with high tolerance of substrate and isopropylamine from a directed soil metagenome

Youyu Xie,<sup>a#</sup> Jiguo Wang,<sup>a#</sup> Lin Yang,<sup>a</sup> Wei Wang,<sup>a</sup> Qinghai Liu,<sup>a</sup> Hualei Wang,<sup>a,\*</sup> and Dongzhi Wei,<sup>a</sup>

<sup>a</sup>State Key Laboratory of Bioreactor Engineering, New World Institute of Biotechnology, East China University of Science and Technology, Shanghai 200237, PR China

#The authors contributed equally to this work.

\*Corresponding author:

Hua-Lei Wang: hlwang@ecust.edu.cn

**Table S1** The information of the 21 recombinant  $\omega$ -transaminases from the mixed soil metagenomic

| Entry | enzyme  | Primer sequences (5'-3')                                                         | Restriction enzyme cutting site   | GenBank accession no. | Identity (%) <sup>a</sup> |
|-------|---------|----------------------------------------------------------------------------------|-----------------------------------|-----------------------|---------------------------|
| 1     | ATA1001 | AACGCGGATCCATGAGCGCTGCCAAACTG<br>AACCCAAGCTTCTAAGCCACTTCCTTGAG                   | <i>Bam</i> H I<br><i>Hind</i> III | AAP92672.1            | 100                       |
| 2     | ATA1002 | AACGCGGATCCATGAACGCCCCCGCCGCTT<br>AACCCAAGCTTTCATGCTACTTCCTTCAGGA                | <i>Bam</i> H I<br><i>Hind</i> III | KGD90311.1            | 100                       |
| 3     | ATA1003 | AACGCGGATCCATGCCCTTTACCGCCAAC<br>AACCCAAGCTTTTACTTGCGCGCTTCAA                    | <i>Bam</i> H I<br><i>Hind</i> III | WP_025425250.1        | 100                       |
| 4     | ATA1004 | AACGCGGATCCATGAACCAGCACACCAAAC<br>AACCCAAGCTTTTACTTGCGCGCTTCAAG                  | <i>Bam</i> H I<br><i>Hind</i> III | WP_034802996.1        | 100                       |
| 5     | ATA1005 | AACGCGGATCCATGCCGAACCTCCGAGGCTTA<br>AACCCAAGCTTTCAGGGCATGGATCGCAA                | <i>Bam</i> H I<br><i>Hind</i> III | WP_043543822.1        | 100                       |
| 6     | ATA1006 | AACGCGGATCCATGCCGCACGCCGCGGAGCT<br>AACCCAAGCTTTCAGGCCGTTTTAGCACCT                | <i>Bam</i> H I<br><i>Hind</i> III | WP_043208183.1        | 100                       |
| 7     | ATA1007 | AACGCGGATCCATGAACATGCCGAAAACC<br>AACCCAAGCTTTCAGTCGATCAGGTTCAAG                  | <i>Bam</i> H I<br><i>Hind</i> III | WP_054572853.1        | 100                       |
| 8     | ATA1008 | AACCGGAATTCATGTCTCCTCAGCGCCTCA<br>AACCCAAGCTTTTACGCGTCCGCGCGCAATA                | <i>Eco</i> R I<br><i>Hind</i> III | WP_068979643.1        | 99                        |
| 9     | ATA1009 | AACGCGGATCCATGAACGCCACAACAAG<br>AACCCAAGCTTTTACTGCACCCGTTTCAAG                   | <i>Bam</i> H I<br><i>Hind</i> III | WP_037390420.1        | 100                       |
| 10    | ATA1010 | AACGCGGATCCATGCCCGATTTGCGGCCCAA<br>AACCCAAGCTTCTAATCCAGCGCGCAAGCA                | <i>Bam</i> H I<br><i>Hind</i> III | WP_110133035.1        | 96                        |
| 11    | ATA1011 | AACCGGAATTCATGAGCCACGACGATCCCA<br>AACCCAAGCTTTCACAGCCCGTCCAGCACCC                | <i>Eco</i> R I<br><i>Hind</i> III | WP_162377787.1        | 92                        |
| 12    | ATA1012 | AACCGGAATTCATGACCGCCCCCTCCGCA<br>AACCCAAGCTTTCAGTCCTCGCCCTCCTTA                  | <i>Eco</i> R I<br><i>Hind</i> III | WP_110132869.1        | 98                        |
| 13    | ATA1013 | AACGCGGATCCATGGCCACCCAAGCAAA<br>AACCGCTCGAGTCATCGGCCGTGGTACAG                    | <i>Bam</i> H I<br><i>Xho</i> I    | WP_054572603.1        | 100                       |
| 14    | ATA1014 | AACGCGGATCCATGTGGAACAGCAGTGCA<br>AACCCAAGCTTTCAGGCCGTATCACCTT                    | <i>Bam</i> H I<br><i>Hind</i> III | WP_023511892.1        | 100                       |
| 15    | ATA1015 | GGGAATTCATATGATGCTATCCAACCTCGCC<br>AACGCGGATCCTCAGGCCGCGAGCAAACCTT               | <i>Nde</i> I<br><i>Bam</i> H I    | WP_043238127.1        | 100                       |
| 16    | ATA1016 | AACGCGGATCCATGGATGCGGTTCAAAC<br>AACCGCTCGAGTTAATTCATTGATAAAGC                    | <i>Bam</i> H I<br><i>Xho</i> I    | EXA90087.1            | 100                       |
| 17    | ATA1017 | AACGCGGATCCATGAACGCTCCGACGCTC<br>AACCGCTCGAGTCATAGGGCGCGCAGCAC                   | <i>Bam</i> H I<br><i>Xho</i> I    | WP_023458938.1        | 100                       |
| 18    | ATA1018 | AACCGGAATTCATGAGCCGCATCATCCAT<br>AACCCAAGCTTTTATGGCGTATCGTCCGC                   | <i>Eco</i> R I<br><i>Hind</i> III | WP_013396903.1        | 100                       |
| 19    | ATA1019 | AACGCGGATCCATGAAGCGTCCCGGAAGCGA<br>AACCCAAGCTTTCAGGCCGTGGCCCGGATCAT              | <i>Bam</i> H I<br><i>Hind</i> III | WP_134734931.1        | 99                        |
| 20    | ATA1020 | AACGCGGATCCATGTTTGATACGGATAAATTCAGTGAC<br>AACCGCTCGAGTTAATTCATTGATAAAGCGCATCGCCC | <i>Bam</i> H I<br><i>Xho</i> I    | EXA90087.1            | 100                       |



A: MeOH (0.1 % TFA), B: water (0.1 % TFA), C: Acetonitrile (0.1 % TFA)

GC Method A: GC program parameters; injector 250 °C; flow rate 1mL/min; temperature program 60°C/hold 2 min.; 90 °C/rate 10 °C per min./hold 2 min; 160 °C/rate 10 °C per min./hold 2 min; 200 °C/rate 10 °C per min./hold 2 min.

GC Method B: GC program parameters; injector 250 °C; flow rate 1.2mL/min; temperature program 100°C/hold 0.5 min.; 250 °C/rate 10 °C per min./hold 2 min.



**Scheme S1** Overview of the structures of the amine group contained pesticides of (A) glufosinate and (B) methylamino abamectin, respectively.



Fig. S1 Multiple sequence alignment analysis. Alignment of multiple amino acid sequences of the ω-transaminases from *Vibrio fluvialis* (GenBank accession no. 3NUI\_A), *Chromobacterim violaceum* (GenBank accession no. WP\_011135573.1), *Ruegeria* sp TM1040 (GenBank accession no. WP\_011540005.1), *Achromobacter denitrificans* (GenBank accession no. AAP92672.1), ATA1002, ATA1008, ATA1009, ATA1012 and ATA1018. Red rectangles with dash line and labeled with the red rectangles represent residues in small binding pocket of the enzyme, and green cycle with dash line and marked with a round represent the residues in large binding pocket of the enzyme; The orange rectangles with dash line and labeled with the orange star represent catalytic residue in the active of the enzyme.



Fig. S2 Molecular mass of ATA1012. (A) SDS-PAGE analysis of cell free extracts and the purified enzyme of ATA1012. The lane 1 was the cell free extract of the ATA1012, lane 2 was the purified enzyme of ATA1012. (B) Calibration curve obtained with standard proteins from Apoferritin from horse spleen (443 kDa),  $\beta$ -Amylase from sweet potato (200 kDa), Alcohol Dehydrogenase from yeast (150 kDa), Carbonic Anhydrase from bovine erythrocytes (29 kDa). The molecular mass determination of purified enzyme of ATA1012 was calculated as referred in the reference <sup>1</sup>.



Fig. S3 Measurements of the apparent kinetic parameters by a Michaelis–Menten nonlinear regression of initial velocity vs. substrate concentration using Origin 8.0. (A) Michaelis–Menten plot of pyruvate concentration,  $K_m = 1.88$  mM. (B) Michaelis–Menten plot of (S)-MBA concentration,  $K_m = 1.31$  mM. (C) Michaelis–Menten plot of 1-Boc piperidone concentration,  $K_m = 1.01$  mM. (D) Michaelis–Menten plot of IPA concentration,  $K_m = 4.20$  mM.



Fig. S4 Effect of various co-solvents on catalytic activity of ATA1012, 10% of different co-solvents were incubated with ATA1012 for 1 h at 37°C.

A

Program: ERRAT2  
File: 1.pdb  
Chain#:B  
Overall quality factor\*\*: 95.735



\*On the error axis, two lines are drawn to indicate the confidence with which it is possible to reject regions that exceed that error value.  
\*\*Expressed as the percentage of the protein for which the calculated error value falls below the 95% rejection limit. Good high resolution structures generally produce values around 95% or higher. For lower resolutions (2.5 to 3Å) the average overall quality factor is around 91%.

B



Fig. S5 The result of the model assessment evaluated by the program ERRAT (A) and the program VERIFY3D (B) in the ATA1012.



Fig. S6 The molecular docking analysis of the ATA1012. (A) The clustering analysis of docking conformation performed by autodock 4.2.6 suite; (B). Overview of the selected docking conformation with the most populated clustering and the lowest binding energy, which was used for further MD simulation.



Fig. S7 The molecular dynamic simulation result obtained by using Amber 16 with GAFF and ff99SB force filed. (A) RMSD of alpha-carbon atoms for ATA1012 during 100 ns MD simulation. (B) The distance between carbonyl carbon (C3) of the substrate ketone 2t and the PMP's exocyclic nitrogen atom during the 100 ns of MD simulation.

## HPLC spectra of chiral amines



Fig. S8 HPLC analysis of the enantioselectivity of the amine product obtained by asymmetric amination of 2t. (A) The HPLC spectra of the (*Rac*)-amine standard sample of 1t; (B) The HPLC spectra of the amine product produced by ATA1012.



**Fig. S9** HPLC analysis of the enantioselectivity of the amine product obtained by asymmetric amination of 2s. (A) The HPLC spectra of the (*Rac*)-amine standard sample of 1s; (B) The HPLC spectra of the amine product produced by ATA1012.

## NMR spectra of the chiral amine products



Fig. S10 The  $^1\text{H}$  NMR spectra of the amine product towards 1t.  $^1\text{H}$  NMR (400 MHz,  $\text{CDCl}_3$ )  $\delta$ /ppm: 3.90 (br, 1H), 3.8–3.7 (m, 1H), 2.8–2.7 (m, 2H), 2.5 (br, 1H), 1.9–1.8 (m, 1H), 1.7–1.6 (m, 1H), 1.4 (s, 9H), 1.3–1.1 (m, 2H).



Fig. S11 The  $^{13}\text{C}$  NMR spectra of the amine product towards 1t.  $^{13}\text{C}$  NMR (100 MHz,  $\text{CDCl}_3$ )  $\delta$  155.0, 79.6, 52.4, 47.7, 44.4 & 43.6, 34.0, 28.5, 23.8. (Two peaks in  $^{13}\text{C}$  NMR of the amine product seen for each carbon in the piperidine ring due to the restricted rotation around the amide bond).



Fig. S12 The  $^1\text{H NMR}$  spectra of the amine product towards 1s.  $^1\text{H NMR}$  (400 MHz,  $\text{CDCl}_3$ )  $\delta$ /ppm: 3.6–3.3 (m, 4H), 3.1–2.9 (m, 1H), 2.1–1.9 (m, 1H), 1.7–1.6 (m, 1H), 1.5 (br, 2H), 1.4 (s, 9H).



Fig. S13 The  $^{13}\text{C NMR}$  spectra of the amine product towards 1s.  $^{13}\text{C NMR}$  (100 MHz,  $\text{CDCl}_3$ )  $\delta$  154.8, 79.2, 54.5 and 54.2, 51.5 and 50.7, 44.4 and 44.1, 34.8 and 34.3, 28.6. (Two peaks in  $^{13}\text{C NMR}$  in pyrrolidine ring due to the restricted rotation around amide bond).

## Reference

1. E. Gizis and L. M. Meyer, *Nature*, 1968, **217**, 272-274.
